# Supplementary material
Source: Springer Nature journal article supplement (https://www.springermedizin.de/resource/supplementary/12958_2008_458_MOESM3_ESM.pdf/9567942)

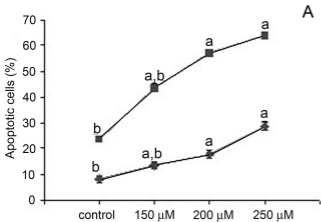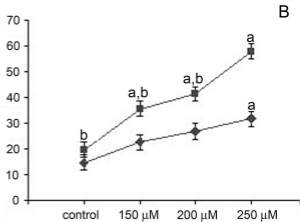

◆ 24 hours  
■ 48 hours

Supplement: MOESM3 [file 9567942]
